# Supplementary material for: Effects of n-6 PUFA-rich soybean oil, MUFA-rich olive oil and camellia seed oil on weight and cardiometabolic profiles among Chinese women: a 3-month double-blind randomized controlled-feeding trial
Source: Royal Society of Chemistry journal article supplement (doi:10.1039/d1fo03759e), 2022-01-01
Supplement: d1fo03759e1.pdf [file d1fo03759e1.pdf]

### **Supplementary materials**

Table S1. Fatty acid compositions of soybean oil, olive oil, and camellia seed oil used in the present trial

Table S2. Protocol for the recruitment, informed consent, population screening, randomization, intervention and follow-up racking

Table S3. Nutrient targets of the present feeding trial

Table S4. One-day sample menu for participants

Table S5. Compliance score of participants among groups

Table S6. Changes of primary and secondary outcomes during intervention

**Table S1. Fatty acid compositions of soybean oil, olive oil, and camellia seed oil used in the present trial**

| Fatty acid | Percentage (%) of total fatty acids, mean $\pm$ SD |                  |                  |
|------------|----------------------------------------------------|------------------|------------------|
|            | Camellia seed oil                                  | Olive oil        | Soybean oil      |
| C16:0      | 8.76 $\pm$ 0.05                                    | 12.87 $\pm$ 0.04 | 10.93 $\pm$ 0.06 |
| C16:1      | /                                                  | 1.14 $\pm$ 0.04  | /                |
| C18:0      | 0.93 $\pm$ 0.48                                    | 1.04 $\pm$ 0.17  | 3.57 $\pm$ 0.16  |
| C18:1 n-9  | 79.45 $\pm$ 0.33                                   | 74.52 $\pm$ 0.12 | 22.36 $\pm$ 0.00 |
| C18:2 n-6  | 9.9 $\pm$ 0.04                                     | 8.91 $\pm$ 0.00  | 56.1 $\pm$ 0.33  |
| C18:3 n-3  | 0.34 $\pm$ 0.05                                    | 0.68 $\pm$ 0.04  | 7.03 $\pm$ 0.10  |
| C20:0      | /                                                  | 0.27 $\pm$ 0.02  | /                |
| C20:1 n-9  | 0.62 $\pm$ 0.08                                    | 0.22 $\pm$ 0.01  | /                |
| SFA        | 9.86 $\pm$ 0.43                                    | 14.53 $\pm$ 0.15 | 14.59 $\pm$ 0.23 |
| MUFA       | 79.94 $\pm$ 0.34                                   | 75.43 $\pm$ 0.26 | 22.36 $\pm$ 0.00 |
| PUFA       | 10.21 $\pm$ 0.09                                   | 10.04 $\pm$ 0.33 | 63.05 $\pm$ 0.23 |

Fatty acid compositions of the three oils were determined by gas chromatography. Abbreviations: SD, standard deviation; SFA, saturated fatty acid; MUFA, monounsaturated fatty acid; PUFA, polyunsaturated fatty acid.

**Table S2. Protocol for the recruitment, informed consent, population screening, randomization, intervention and follow-up racking.**

---

Recruitment and informed consent

- Recruitment mainly conducted offline and online
- Stimulating the enthusiasm and participation of potential participants
- Informed consent for screening period <sup>a</sup>

Participants screening round 1

- Conformity of participants' clinical and anthropometric parameters
- Medical history questionnaire
- Eating habits questionnaire (including allergen record)

Participants screening round 2

- Eligibility testing (12-hour fasting blood sample were used)

Randomization

- Randomly assigned to one of the three diets using different cooking oils

Dietary Intervention

- Intervention last for 3 months
- Lunch and dinner provided
- Recording the typical breakfast (requiring to avoid vegetable oil intake) <sup>b</sup>

Follow-up racking

- Daily diet records
  - Self-reported compliance
  - Adherence assessment <sup>c</sup>
- 

<sup>a</sup> All potential participants were required to sign the informed consent before screening round 1.

<sup>b</sup> The present trial only provided lunch and dinner, participants were required to record their breakfast and avoid intake of vegetable oil in breakfast.

<sup>c</sup> Adherence to the intervention were assessed by scores of daily diet records (account 60% for adherence assessment) and self-reported compliance (account 40% for adherence assessment). Daily diet records included the number of uneaten meals and the quantity of uneaten food observed directly by the food supply personnel. Self-reported compliance was based on their performance in what required (snacks and extra meals are discouraged, food containing vegetable oils is especially restricted).

**Table S3. Nutrient targets of the present feeding trial**

| Items                           | Targets        |
|---------------------------------|----------------|
| Carbohydrate, % of total energy | 45%-65%        |
| Fat, % of total energy          | 20%-35%        |
| Protein, % of total energy      | 10%-35%        |
| Total energy                    | 2100-2300 kcal |

**Table S4. One-day sample menu for participants**

| Meals                  | Food item           | g         |     |
|------------------------|---------------------|-----------|-----|
| Breakfast <sup>a</sup> | Egg                 | 40        |     |
|                        | Rice porridge       |           |     |
|                        | Rice                | 300       |     |
|                        | Fermented bean curd | 40        |     |
|                        | Steamed stuffed bun |           |     |
|                        | Flour               | 100       |     |
|                        | Pork                | 35        |     |
|                        | Ginger              | 3         |     |
| Lunch <sup>b</sup>     | Rice                | 200       |     |
|                        | Dish A              |           |     |
|                        | Fish                | 130       |     |
|                        | Spring onion        | 3         |     |
|                        | Dish B              |           |     |
|                        | Tomato              | 200       |     |
|                        | Egg                 | 80        |     |
|                        | Spring onion        | 3         |     |
|                        | Dish C              |           |     |
|                        | Tofu                | 200       |     |
|                        | Cooking oil         | 15        |     |
|                        | Salt                | 2         |     |
|                        | Dinner <sup>b</sup> | Rice      | 200 |
|                        |                     | Dish A    |     |
| Potato                 |                     | 170       |     |
| Green pepper           |                     | 30        |     |
| Dish B                 |                     |           |     |
| Broccoli               |                     | 200       |     |
| Garlic                 |                     | 5         |     |
| Dish C                 |                     |           |     |
| Chicken leg            |                     | 130       |     |
| Cooking oil            |                     | 15        |     |
| Salt                   |                     | 2         |     |
| Energy                 |                     |           |     |
| Breakfast              |                     | 527 kcal  |     |
| Lunch and dinner       |                     | 1626 kcal |     |
| Total                  |                     | 2153 kcal |     |

<sup>a</sup> Breakfast was not provided during the intervention, but all participants were asked to strictly avoid the intake of vegetable oil fats. According to the survey of daily eating habits, a typical menu breakfast was displayed.

<sup>b</sup> The menus of lunch and dinner were the same across the three intervention groups, except for the different cooking oils (soybean oil, olive oil, and camellia seed oil) used.

**Table S5. Compliance score of participants among groups**

| Compliance score              | Mean $\pm$ SD   |                 |                 |                 | <i>P</i> -value <sup>a</sup> |
|-------------------------------|-----------------|-----------------|-----------------|-----------------|------------------------------|
|                               | All             | SO group        | OO group        | CSO group       |                              |
| Self-assessment <sup>b</sup>  | 6.98 $\pm$ 1.10 | 7.07 $\pm$ 1.16 | 6.88 $\pm$ 1.20 | 6.97 $\pm$ 0.98 | 0.82                         |
| Staff-assessment <sup>c</sup> | 9.77 $\pm$ 0.45 | 9.66 $\pm$ 0.55 | 9.79 $\pm$ 0.41 | 9.88 $\pm$ 0.33 | 0.18                         |
| Total <sup>d</sup>            | 8.65 $\pm$ 1.10 | 8.62 $\pm$ 0.64 | 8.68 $\pm$ 0.51 | 8.66 $\pm$ 0.53 | 0.92                         |

<sup>a</sup> Group differences in scores were investigated by one-way ANOVA.

<sup>b</sup> The participants were scoring themselves (scale of 1 to 10) based on their performance on required items (snacks and extra meals were discouraged, extra direct intake of vegetable oils was especially restricted).

<sup>c</sup> The staff-assessment score was assessed by follow-up research personnel and was the sum of the staff-assessment I score and staff-assessment II score. Participants scores 1 to 5 for the staff-assessment I score when the number of uneaten meals account for less than 10%, 9.25%, 7.5%, 6.25%, and 5% of total meals, respectively. Participants scores 1 to 5 for the staff-assessment II score when the remaining quantity of each meal account for less than 30%, 25%, 20%, 15%, and 10% of total quantity for each meal, respectively.

<sup>d</sup> The total compliance score was calculated by formula: self-assessment score \* 0.4 + staff assessment score \* 0.6.

Abbreviation: SO, soybean oil; OO, olive oil; CSO, camellia seed oil.

**Table S6. Mean changes (95% CIs) of primary and secondary outcomes during intervention**

| Outcomes (Changes from baseline)        | SO group                          |                                   | OO group                          |                                   | CSO group                         |                                   | <i>P</i> value <sup>a</sup> |            |
|-----------------------------------------|-----------------------------------|-----------------------------------|-----------------------------------|-----------------------------------|-----------------------------------|-----------------------------------|-----------------------------|------------|
|                                         | Medium-term                       | End                               | Medium-term                       | End                               | Medium-term                       | End                               | OO vs. SO                   | CSO vs. SO |
| Weight, kg                              | -0.11 (-0.58, 0.35)               | -0.31 (-0.88, 0.27)               | 0.29 (-0.05, 0.63)                | -0.13 (-0.62, 0.36)               | -0.43 (-1.03, 0.16)               | -0.72 (-1.38, -0.07)              | 0.50                        | 0.17       |
| Waist circumference, cm                 | -1.50 (-3.76, 0.69)               | 0.88 (-2.41, 4.17)                | -0.23 (-2.34, 1.88)               | 2.04 (0.11, 3.97) <sup>b</sup>    | -3.40 (-5.53, -1.26)              | 0.67 (-1.35, 2.70)                | 0.68                        | 0.92       |
| Diastolic blood pressure, mmHg          | -2.34 (-5.96, 1.27)               | -3.69 (-6.83, -0.55) <sup>b</sup> | 2.11 (-0.21, 4.42)                | -1.04 (-4.91, 2.83)               | -0.69 (-2.64, 1.26)               | -0.93 (-4.00, 2.14)               | 0.10                        | 0.38       |
| Systolic blood pressure, mmHg           | 0.28 (-4.99, 5.54)                | -2.34 (-5.70, 1.01)               | 2.39 (-2.98, 7.77)                | 1.40 (-2.48, 5.28)                | 2.45 (-0.89, 5.78)                | 0.34 (-3.93, 4.62)                | 0.53                        | 0.52       |
| Triglycerides, mmol/L                   | 0.11 (-0.03, 0.25)                | -0.01 (-0.19, 0.16)               | 0.26 (-0.04, 0.56)                | 0.04 (-0.18, 0.26)                | 0.13 (-0.06, 0.31)                | 0.02 (-0.14, 0.18)                | 0.38                        | 0.62       |
| Total cholesterol, mmol/L               | -0.27 (-0.51, -0.04)              | -0.20 (-0.49, 0.08)               | -0.17 (-0.38, 0.04)               | 0.09 (-0.23, 0.42)                | -0.13 (-0.35, 0.09)               | -0.01 (-0.28, 0.25)               | 0.30                        | 0.34       |
| HDL-cholesterol, mmol/L                 | -0.14 (-0.21, -0.07) <sup>b</sup> | -0.11 (-0.19, -0.03) <sup>b</sup> | -0.03 (0.10, 0.03)                | 0.02 (-0.05, 0.08)                | -0.10 (-0.17, -0.03) <sup>b</sup> | -0.10 (-0.18, -0.03) <sup>b</sup> | 0.03                        | 0.52       |
| LDL-cholesterol, mmol/L                 | 0.20 (0.04, 0.37) <sup>b</sup>    | 0.25 (0.02, 0.48) <sup>b</sup>    | 0.23 (0.06, 0.39) <sup>b</sup>    | 0.44 (0.16, 0.71) <sup>b</sup>    | 0.33 (0.16, 0.50) <sup>b</sup>    | 0.41 (0.22, 0.60) <sup>b</sup>    | 0.46                        | 0.36       |
| Apolipoprotein A1, g/L                  | -0.09 (-0.16, -0.03) <sup>b</sup> | 0.12 (0.00, 0.25) <sup>b</sup>    | 0.03 (-0.04, 0.09)                | 0.28 (0.13, 0.43) <sup>b</sup>    | -0.05 (-0.11, 0.01)               | 0.07 (-0.01, 0.16)                | 0.11                        | 0.89       |
| Apolipoprotein B, g/L                   | -0.02 (-0.06, 0.03)               | 0.01 (-0.04, 0.07)                | -0.03 (-0.08, 0.02)               | 0.05 (-0.02, 0.11)                | -0.01 (-0.07, 0.04)               | 0.03 (-0.02, 0.08)                | 0.87                        | 0.82       |
| Lipoprotein (a), mg/L                   | -9.7 (-27.5, 8.2)                 | 41.7 (17.6, 65.7) <sup>b</sup>    | -12.3 (-27.6, 2.9)                | 31.3 (5.7, 56.9) <sup>b</sup>     | -9.3 (-21.4, 2.8)                 | 37.9 (14.1, 60.6) <sup>b</sup>    | 0.81                        | 0.66       |
| Alanine transaminase, U/L               | -2.17 (-4.24, -0.11) <sup>b</sup> | -0.24 (-4.71, 4.22)               | -0.46 (-4.27, 3.34)               | -1.44 (-4.04, 1.16)               | -2.86 (-7.81, 2.08)               | -4.59 (-9.84, 0.67)               | 0.99                        | 0.19       |
| Aspartate aminotransferase, U/L         | -0.10 (-1.12, 0.91)               | 1.79 (-0.86, 4.45)                | -1.03 (-3.95, 1.88)               | -0.72 (-2.25, 0.81)               | -2.24 (-4.95, 0.47)               | -1.72 (-4.73, 1.28)               | 0.27                        | 0.02       |
| Lactate dehydrogenase, U/L              | -10.7 (-16.3, -5.1) <sup>b</sup>  | -4.7 (-11.4, 1.9)                 | -15.6 (-21.3, -10.0) <sup>b</sup> | -3.3 (-12.0, 5.3)                 | -8.7 (-14.8, -2.5)                | -2.1 (-20.0, 15.8)                | 0.40                        | 0.63       |
| Creatine kinase, U/L                    | -14.8 (-31.1, 1.6)                | -19.7 (-36.3, -3.0) <sup>b</sup>  | -37.9 (-75.8, 0.2)                | -21.9 (-37.4, -6.4) <sup>b</sup>  | -9.5 (-35.2, 16.3)                | -26.2 (-47.9, -4.6) <sup>b</sup>  | 0.39                        | 0.82       |
| Creatine kinase MB, U/L                 | 0.68 (-0.82, 2.17)                | -1.03 (-2.30, 0.23)               | 5.0 (-6.3, 16.3)                  | 1.59 (-3.32, 6.50)                | 0.10 (-0.97, 1.16)                | 0.33 (-2.06, 2.72)                | 0.46                        | 0.76       |
| Tumor necrosis factor- $\alpha$ , pg/mL | -1.53 (-2.42, -0.65) <sup>b</sup> | -1.26 (-2.07, -0.46) <sup>b</sup> | -1.34 (-1.92, -0.76) <sup>b</sup> | -1.26 (-2.20, -0.32) <sup>b</sup> | -1.79 (-2.65, -0.92) <sup>b</sup> | -1.34 (-2.18, -0.51) <sup>b</sup> | 0.89                        | 0.65       |

|                                                      |                                    |                                    |                                   |                                   |                                   |                                   |      |      |
|------------------------------------------------------|------------------------------------|------------------------------------|-----------------------------------|-----------------------------------|-----------------------------------|-----------------------------------|------|------|
| Interleukin-6, pg/mL                                 | 0.87 (0.19, 1.55) <sup>b</sup>     | 0.14 (-0.27, 0.54)                 | 1.07 (0.54, 1.60) <sup>b</sup>    | 0.64 (0.20, 1.08) <sup>b</sup>    | 0.27 (-1.10, 1.64)                | -0.13 (-0.76, 0.49)               | 0.65 | 0.21 |
| Interleukin-8, pg/mL                                 | -67.2 (-115.5, -18.9) <sup>b</sup> | -71.2 (-118.8, -23.5) <sup>b</sup> | -49.1 (-71.3, -26.9) <sup>b</sup> | -49.6 (-74.6, -24.7) <sup>b</sup> | -57.6 (-94.4, -20.8) <sup>b</sup> | -54.3 (-89.3, -19.3) <sup>b</sup> | 0.40 | 0.62 |
| Hypersensitive C-reactive protein, mg/L              | -0.05 (-1.36, 1.27)                | -0.01 (-0.70, 0.67)                | 0.37 (-0.36, 1.11)                | 0.30 (-0.49, 1.09)                | -0.02 (-0.36, 0.32)               | -0.01 (-0.39, 0.37)               | 0.38 | 0.78 |
| Myoglobin, ng/mL                                     | -0.68 (-4.14, 2.77)                | 0.45 (-2.81, 3.72)                 | -1.24 (-3.95, 1.47)               | -0.15 (-3.26, 2.96)               | -1.11 (-5.95, 3.73)               | -0.06 (-3.99, 3.87)               | 0.95 | 0.70 |
| Homocysteine, umol/L                                 | -1.32 (-1.78, -0.86) <sup>b</sup>  | -0.86 (-1.62, -0.09) <sup>b</sup>  | -1.33 (-2.17, -0.49) <sup>b</sup> | 0.24 (-1.89, 2.37)                | -1.62 (-2.91, -0.32) <sup>b</sup> | -0.54 (-1.74, 0.66)               | 0.56 | 0.93 |
| N-terminal pro-brain natriuretic peptide, pg/mL      | 6.3 (-5.0, 17.5)                   | 5.4 (-7.0, 17.9)                   | -2.8 (-19.1, 13.5)                | -8.4 (-22.0, 5.2)                 | 11.2 (-0.6, 22.9)                 | 1.4 (-8.2, 11.1)                  | 0.12 | 0.80 |
| Hypersensitive troponin I, pg/mL                     | -1.25 (-1.53, -0.97) <sup>b</sup>  | -0.15 (-0.45, 0.15)                | -1.12 (-1.66, -0.58) <sup>b</sup> | 0.16 (-0.70, 1.02)                | -1.36 (-1.78, -0.94) <sup>b</sup> | 0.2 (-1.0, 1.4)                   | 0.68 | 0.68 |
| High-sensitivity troponin T, pg*10 <sup>-3</sup> /mL | 1.51 (1.17, 1.87) <sup>b</sup>     | 1.10 (0.73, 1.48) <sup>b</sup>     | 1.34 (0.95, 1.72) <sup>b</sup>    | 1.12 (0.63, 1.61) <sup>b</sup>    | 1.29 (0.87, 1.72) <sup>b</sup>    | 0.97 (0.57, 1.37) <sup>b</sup>    | 0.38 | 0.20 |

<sup>a</sup> Linear mixed models with adjusting for age and communities of participants were using to examine group differences in changes of outcomes.

<sup>b</sup> Indicates a *P* value < 0.05 by paired t-test for the changes of outcomes between timepoints within groups.

Abbreviation: SO, soybean oil; OO, olive oil; CSO, camellia seed oil.
